# Supplementary material for: New self-assembled supramolecular polymers formed by self-complementary sextuple hydrogen bond motifs
Source: Royal Society of Chemistry journal article supplement (doi:10.1039/c2ra21039h), 2012-01-01
Supplement: c2ra21039h.pdf [file c2ra21039h.pdf]

**Supporting information for**

**New Self-Assembled Supramolecular Polymers Formed by Self-  
Complementary Sextuple Hydrogen Bond Motifs**

Chih-Chia Cheng,<sup>a</sup> I-Hong Lin,<sup>a</sup> Ying-Chieh Yen,<sup>a</sup> Chih-Wei Chu,<sup>bc</sup> Fu-Hsiang Ko,<sup>d</sup> Xinling  
Wang<sup>e</sup> and Feng-Chih Chang<sup>\*,af</sup>

<sup>a</sup>. Institute of Applied Chemistry, National Chiao-Tung University, Hsinchu 30050, Taiwan

<sup>b</sup>. Research Center for Applied Sciences, Academia Sinica, Taipei 11529, Taiwan

<sup>c</sup>. Department of Photonics, National Chiao-Tung University, Hsinchu 30050, Taiwan

<sup>d</sup>. Department of Materials Science and Engineering, National Chiao-Tung University, Hsinchu 30050, Taiwan

<sup>e</sup>. School of Chemistry & Chemical Technology, Shanghai Jiao Tong University, Shanghai 200240, P. R. China

<sup>f</sup>. Department of Materials and Optoelectronic Science, National Sun Yat-Sen University, Kaohsiung 80424, Taiwan

|                                                           | <b>Pages</b> |
|-----------------------------------------------------------|--------------|
| <b>Index</b>                                              | <b>S1</b>    |
| <b>Syntheses</b>                                          | <b>S2</b>    |
| <b>Variable Temperature <sup>1</sup>H NMR Experiments</b> | <b>S8</b>    |
| <b>Isothermal Crystallization Kinetics</b>                | <b>S10</b>   |
| <b>Diffusion NMR Experiments</b>                          | <b>S12</b>   |
| <b>FT-IR Spectra</b>                                      | <b>S13</b>   |
| <b>Polarized Optical Microscopy</b>                       | <b>S14</b>   |
| <b>Dynamic Light Scattering Analysis</b>                  | <b>S15</b>   |
| <b>References</b>                                         | <b>S16</b>   |





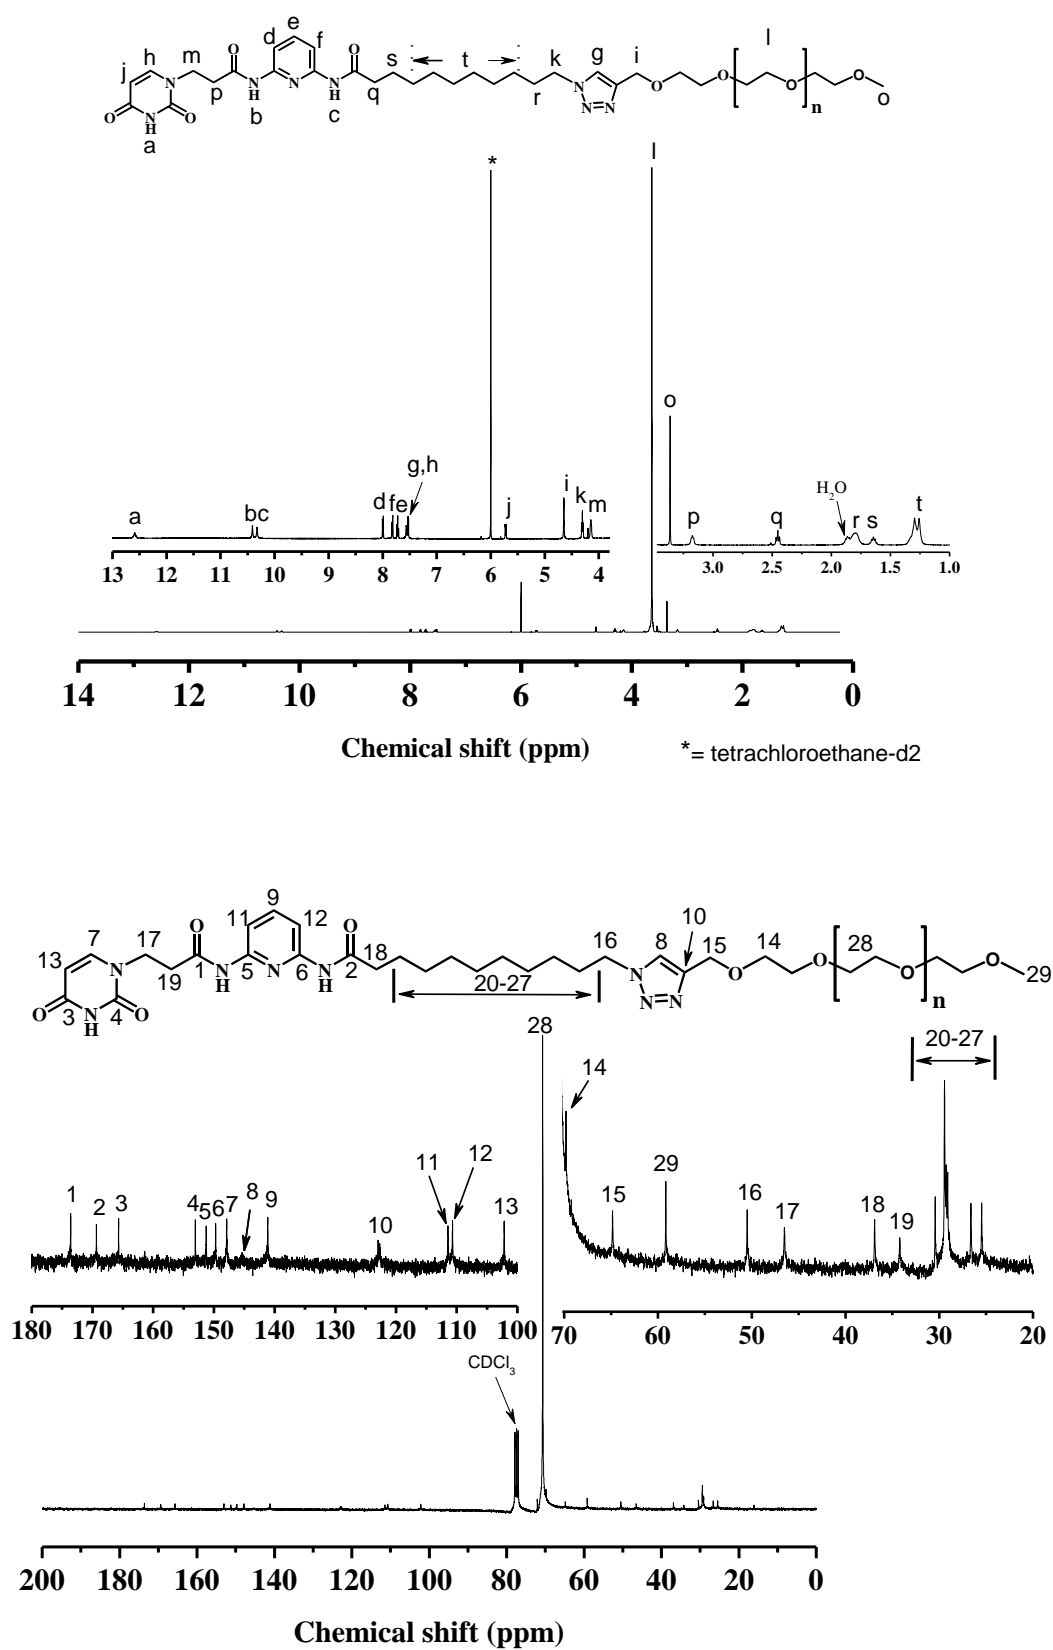

**Figure S1.**  $^1\text{H}$  and  $^{13}\text{C}$  NMR spectra of MU-DPy-PEG1T.

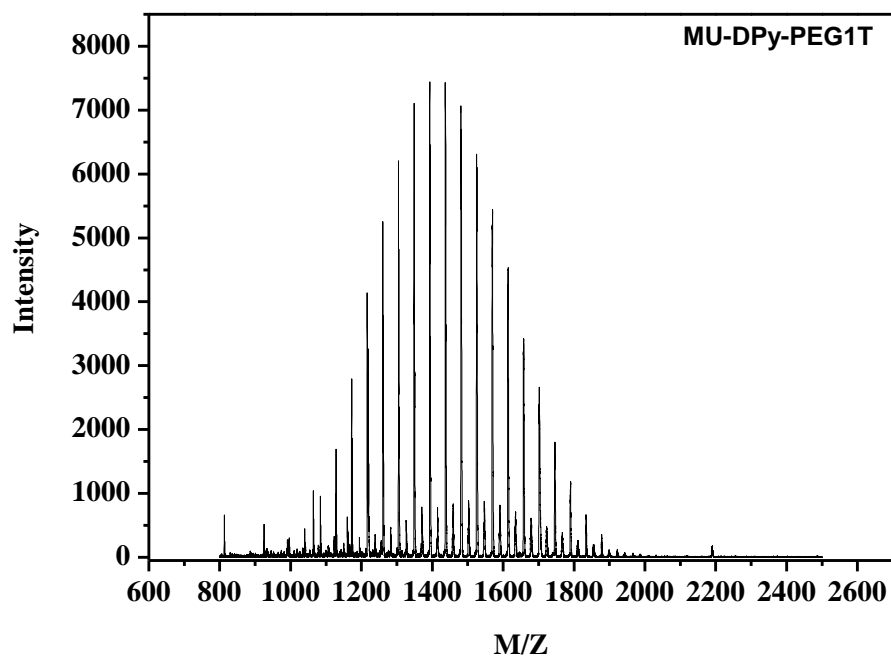

**Figure S2.** MALDI-TOF mass spectrum of MU-DPy-PEG1T.

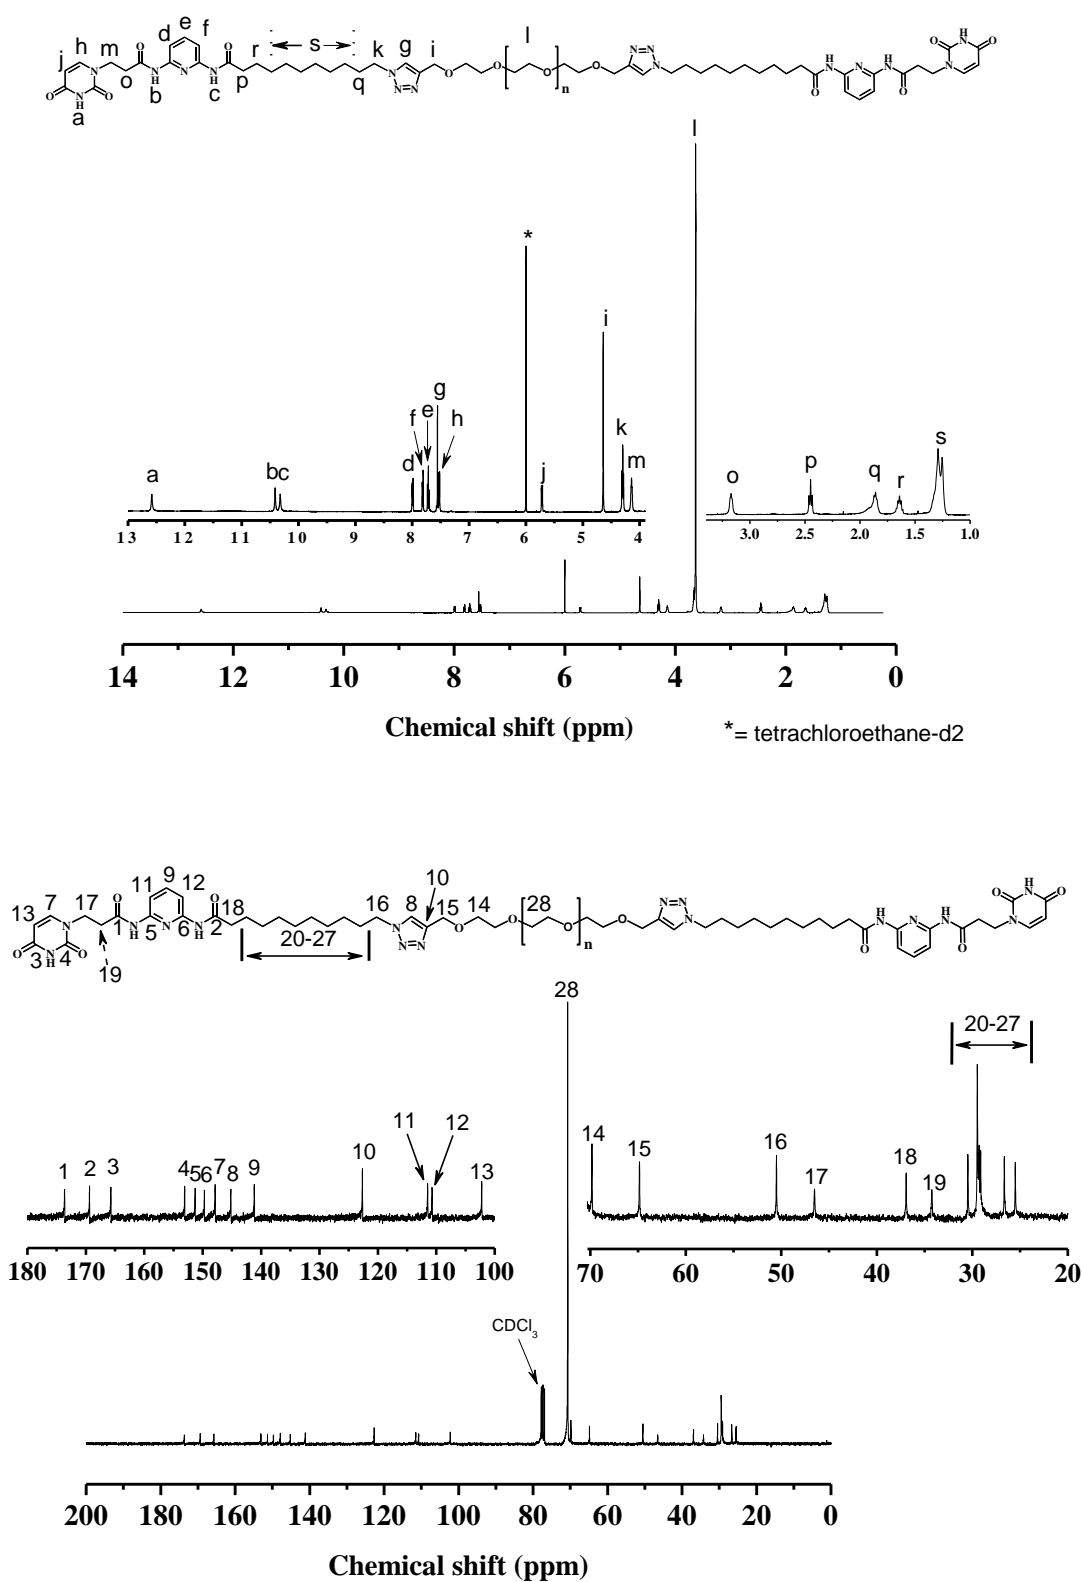

**Figure S3.**  $^1\text{H}$  and  $^{13}\text{C}$  NMR spectra of BU-DPy-PEG1T.

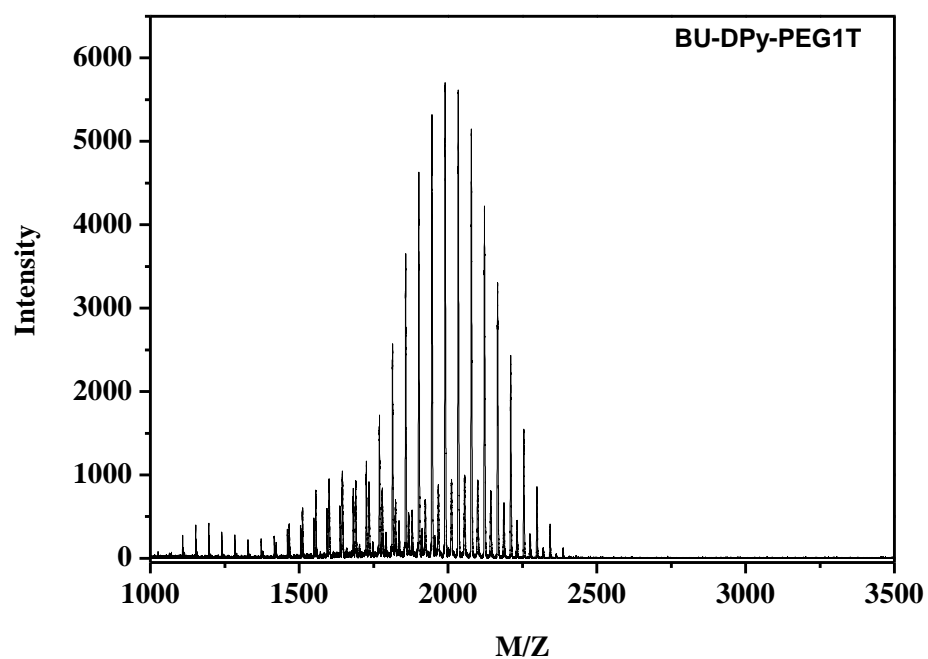

**Figure S4.** MALDI-TOF mass spectrum of BU-DPy-PEG1T.

## Variable-Temperature NMR Experiments

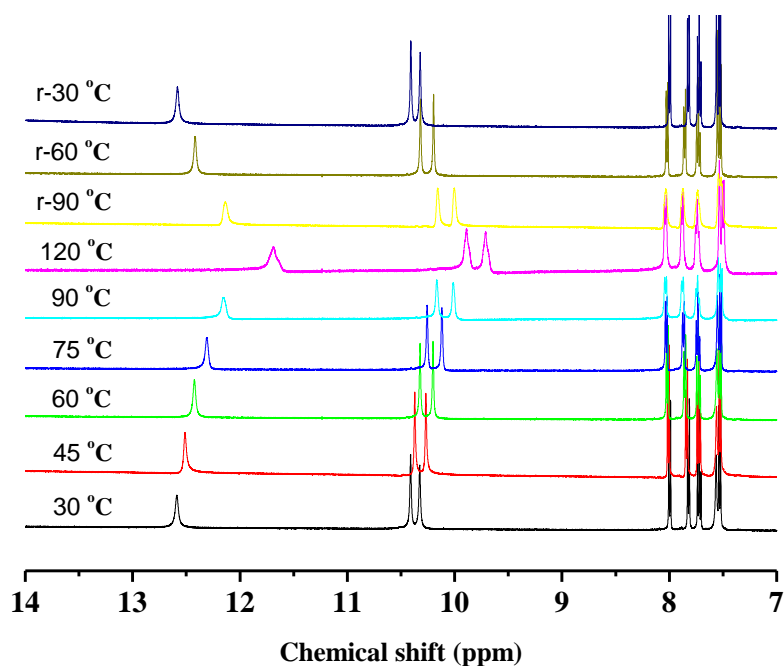

**Figure S5a.**  $^1\text{H}$  NMR spectra at various temperatures for a 40 mM solution of MU-DPy-PEG1T in  $\text{tetrachloroethane-}d_2$ .

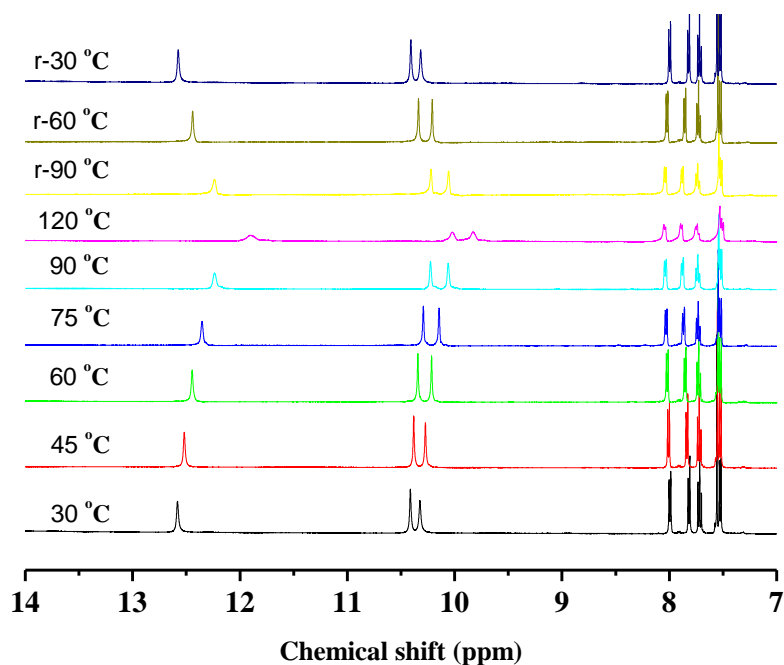

**Figure S5b.**  $^1\text{H}$  NMR spectra at various temperatures for a 40 mM solution of BU-DPy-PEG1T in  $\text{tetrachloroethane-}d_2$ .

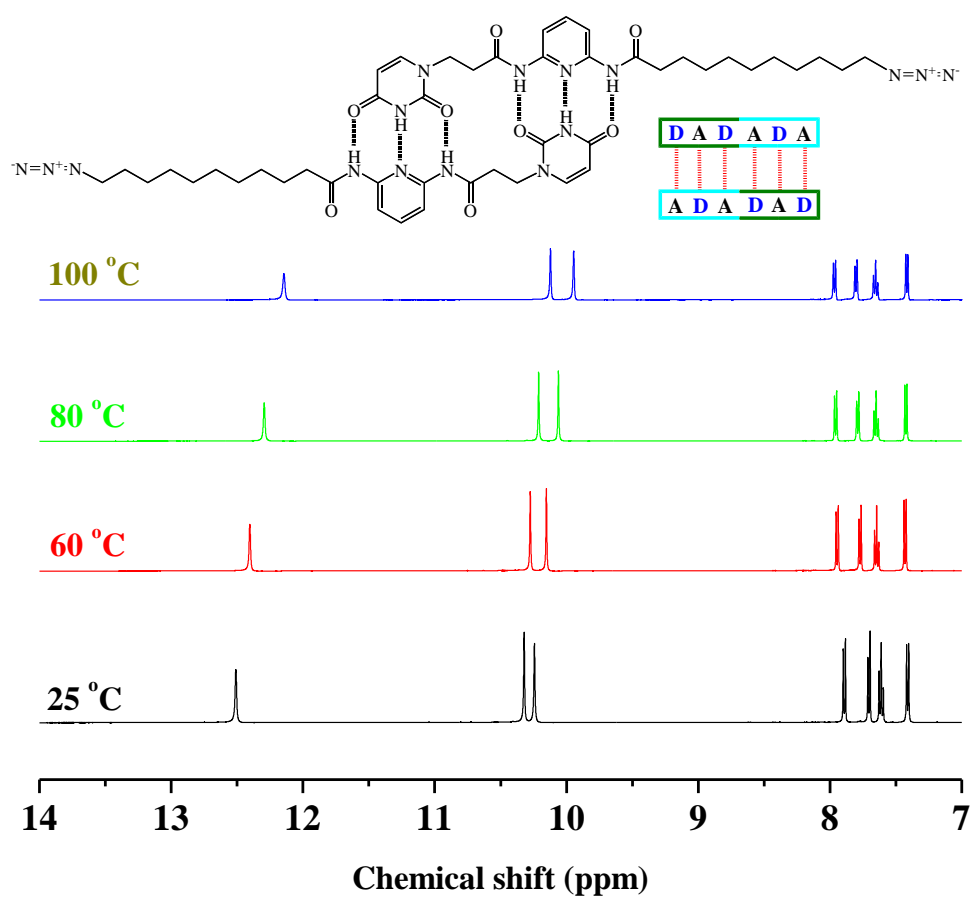

**Figure S6.**  $^1H$  NMR spectra at various temperatures for a 40 mM solution of N3-U-DPy in tetrachloroethane- $d_2$ .

## Isothermal Crystallization Kinetics

The conversion of crystallization as functions of time was representatively shown in **Figure S7** and **S8**. The kinetics of isothermal crystallization of the MU-DPy-PEG1T and PEG 1000 was analyzed using Avrami equation (in **Figure S9** and **S10**). The experimental results are well coincident with the linear relation for the early part of transformation.

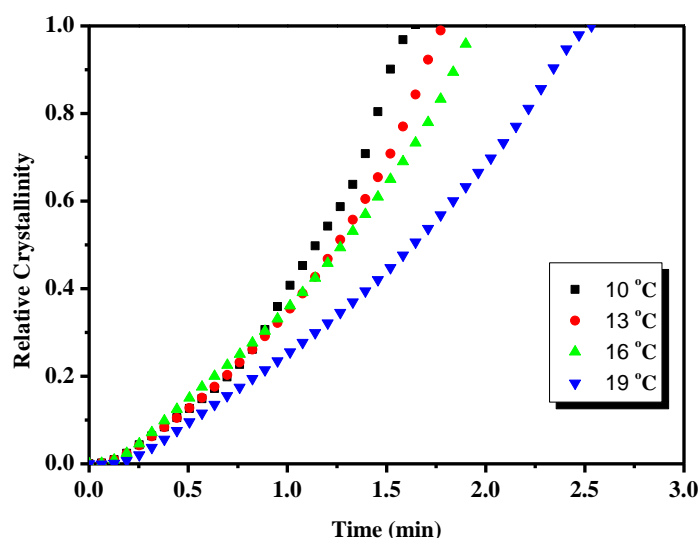

**Figure S7.** Crystallization isotherms of control PEG 1000 at different temperatures.

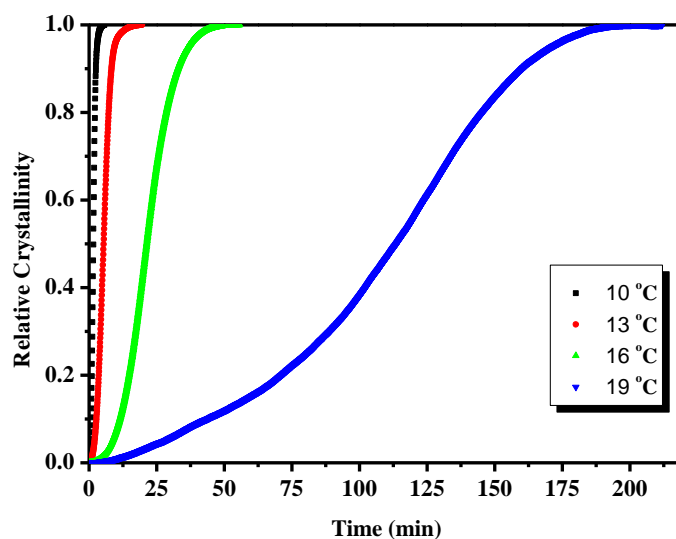

**Figure S8.** Crystallization isotherms of MU-DPy-PEG1T at different temperatures.

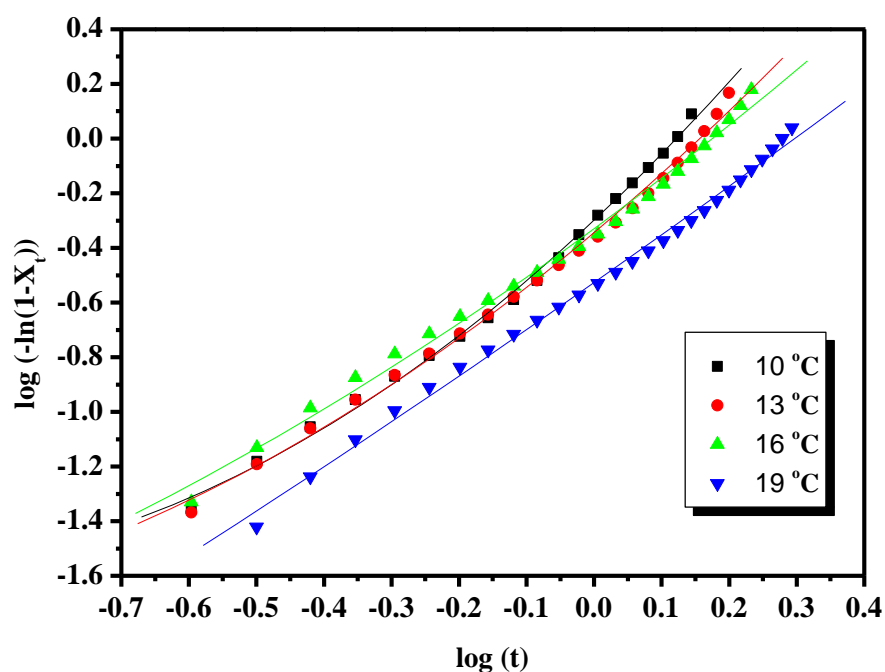

**Figure S9.** Avrami plot for control PEG 1000 at different temperatures.

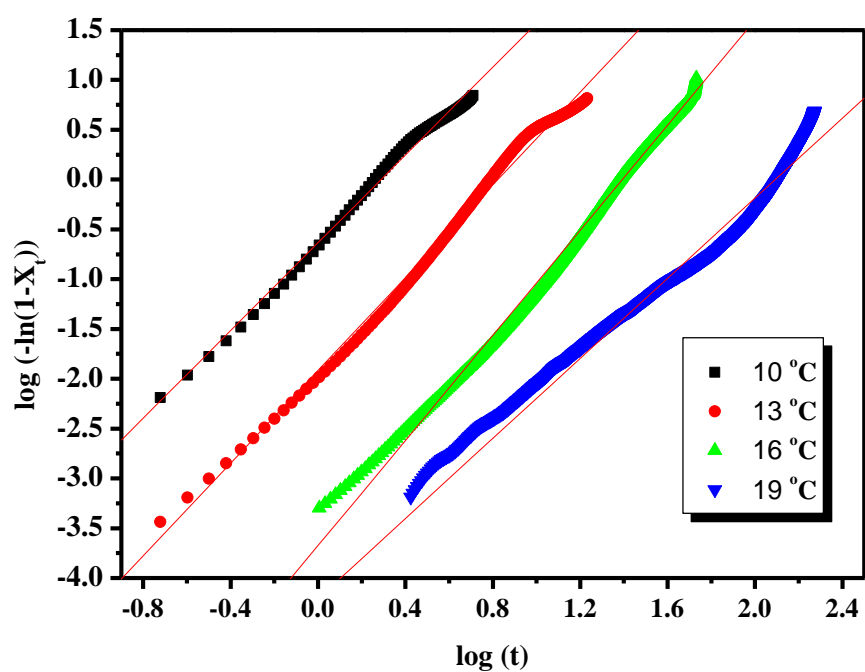

**Figure S10.** Avrami plot for MU-DPy-PEG1T at different temperatures.

## Diffusion NMR Experiments

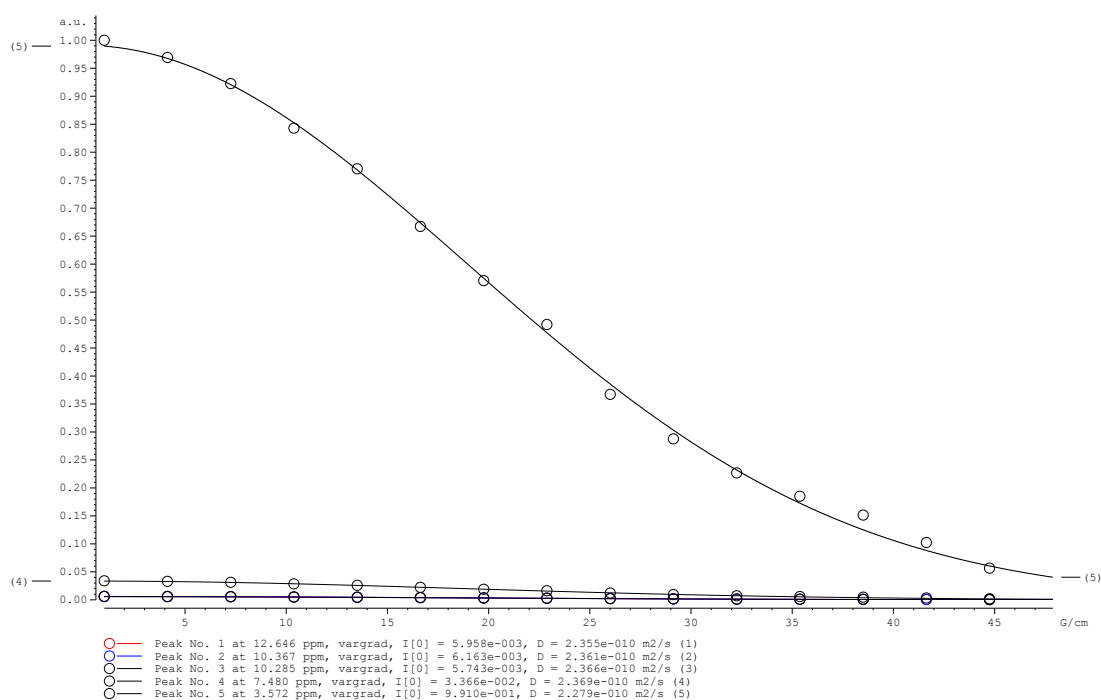

**Figure S11.** Plot of normalized intensity vs. gradient strength, showing non-linear curve fit and calculated diffusion coefficient ( $D$ ) for a 16.7 mg/dL solution of BU-DPy-PEG1T. in CDCl<sub>3</sub>.

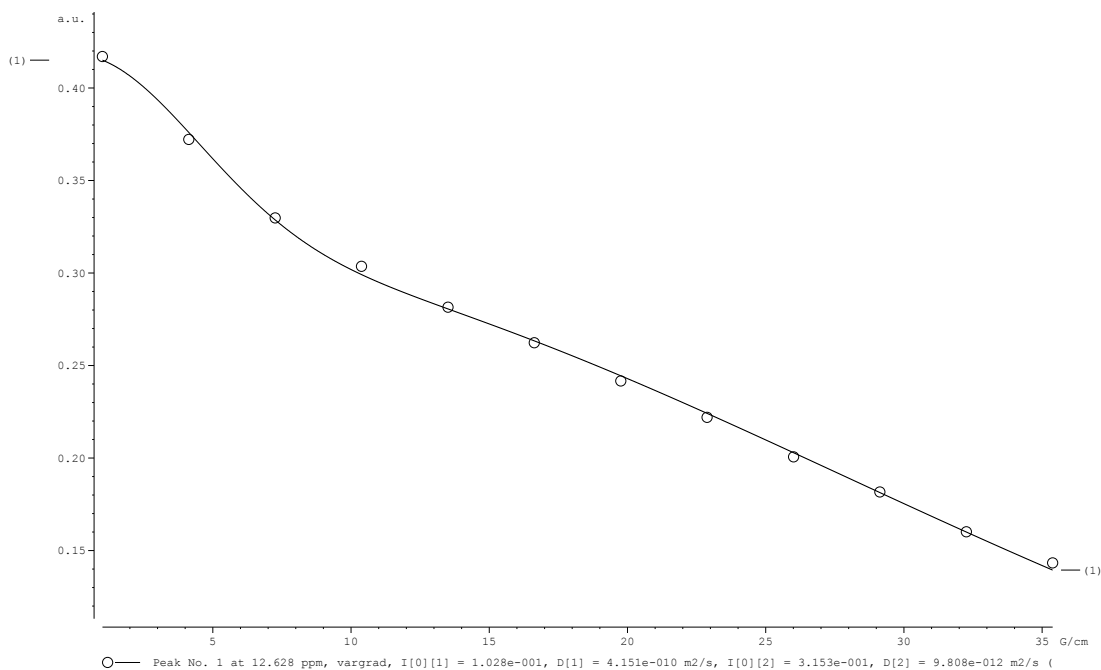

**Figure S12.** Plot of normalized intensity vs. gradient strength, showing non-linear curve fit and calculated diffusion coefficient ( $D$ ) for a 167 mg/dL solution of BU-DPy-PEG1T. in CDCl<sub>3</sub>.

## FT-IR Spectra

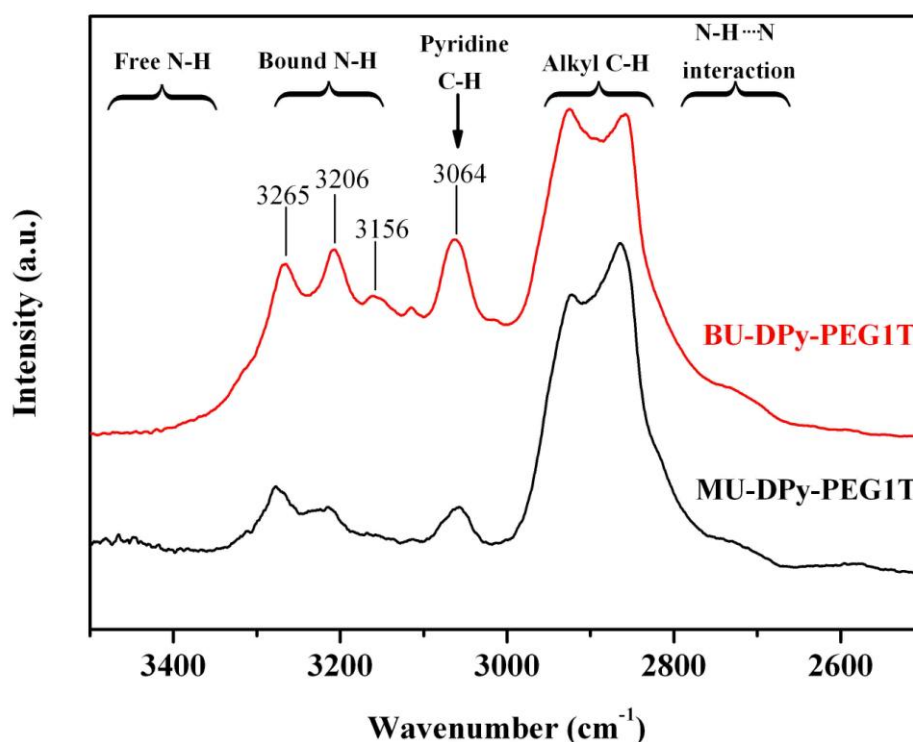

**Figure S13.** FTIR spectra recorded at room temperature in the range 2500–3500  $\text{cm}^{-1}$  for MU-DPy-PEG1T and BU-DPy-PEG1T in the bulk state.

Figure S13 illustrates FTIR spectra of the N-H stretching region of MU-DPy-PEG1T and BU-DPy-PEG1T. Vibration at 3265  $\text{cm}^{-1}$  corresponds to the stretching of the medium hydrogen-bonded N-H groups, and the characteristic peaks at 3156 and 3206  $\text{cm}^{-1}$  are frequencies generally observed for strongly hydrogen-bonded N-H. Notably, an absorption peak above 2650–2780  $\text{cm}^{-1}$  occurs, indicative for N-H...N inter-association, which implies that uracil groups are highly complementary to the DAP group.

## Polarized Optical Microscopy

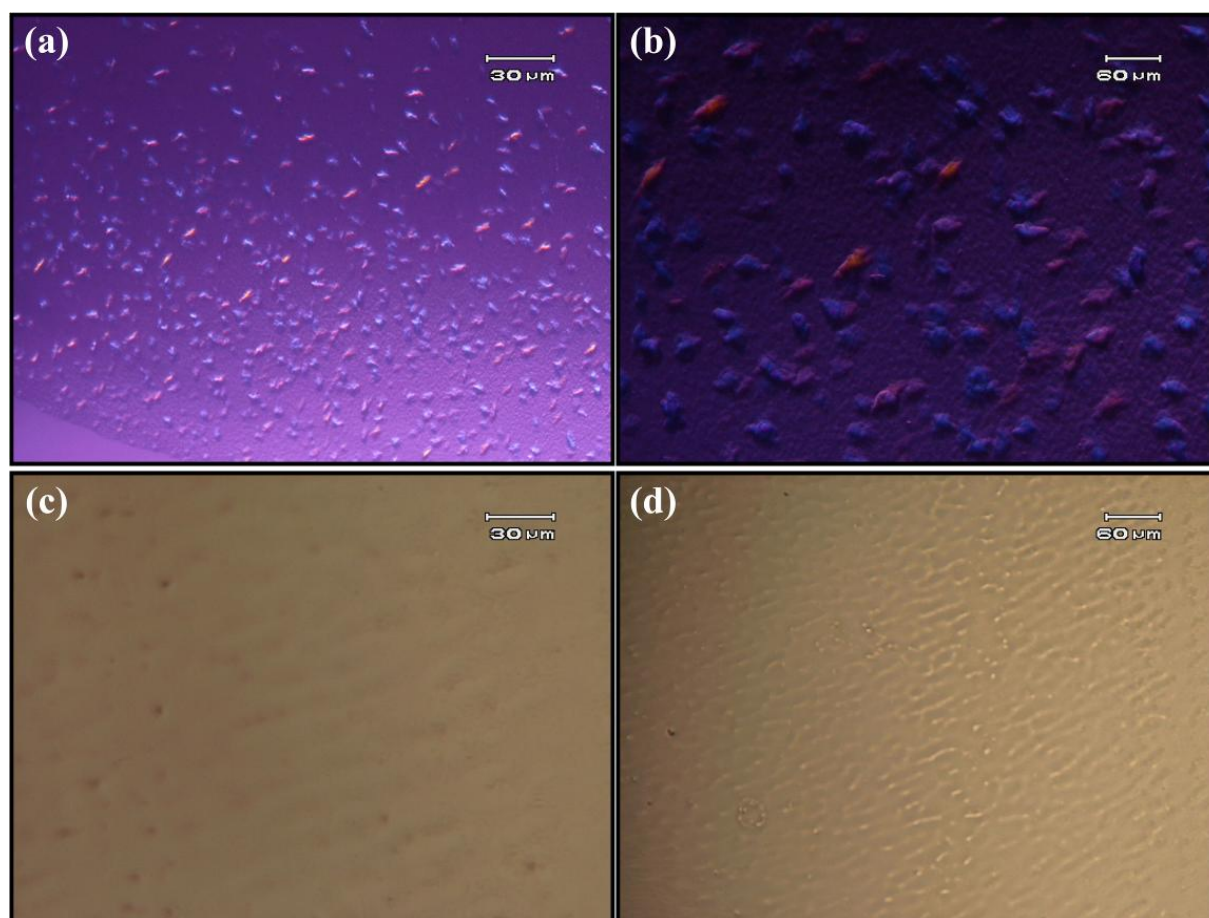

**Figure S14.** Polarized optical microscopy of (a, b) MU-DPy-PEG1T and (c, d) BU-DPy-PEG1T.

The polarized optical microscope (POM) were undertaken in order to compare the crystallization behaviors of MU-DPy-PEG1T and BU-DPy-PEG1T at room temperature. The results presented in Figure S14 suggest that the crystal morphology formed in MU-DPy-PEG1T thin film. In addition, it is easier to distinguish the crystalline and amorphous phase for polymer crystallization by using a transmission mode with a gypsum plate. This indicates that a pink color is denoted as an amorphous phase whereas crystalline birefringence is blue (Figure S14a and b). In contrast, BU-DPy-PEG1T show no birefringence in POM images (Figure S14c and d). This result also confirms that BU-DPy-PEG1T is amorphous. In other word, the attachment of difunctional U-DPy to PEGIT chain ends led to the disappearance of PEGIT crystallization, suggesting that the U-DPy groups on chain ends possess steric effect to hinder the formation of PEGIT crystalline.

## Dynamic Light Scattering analysis

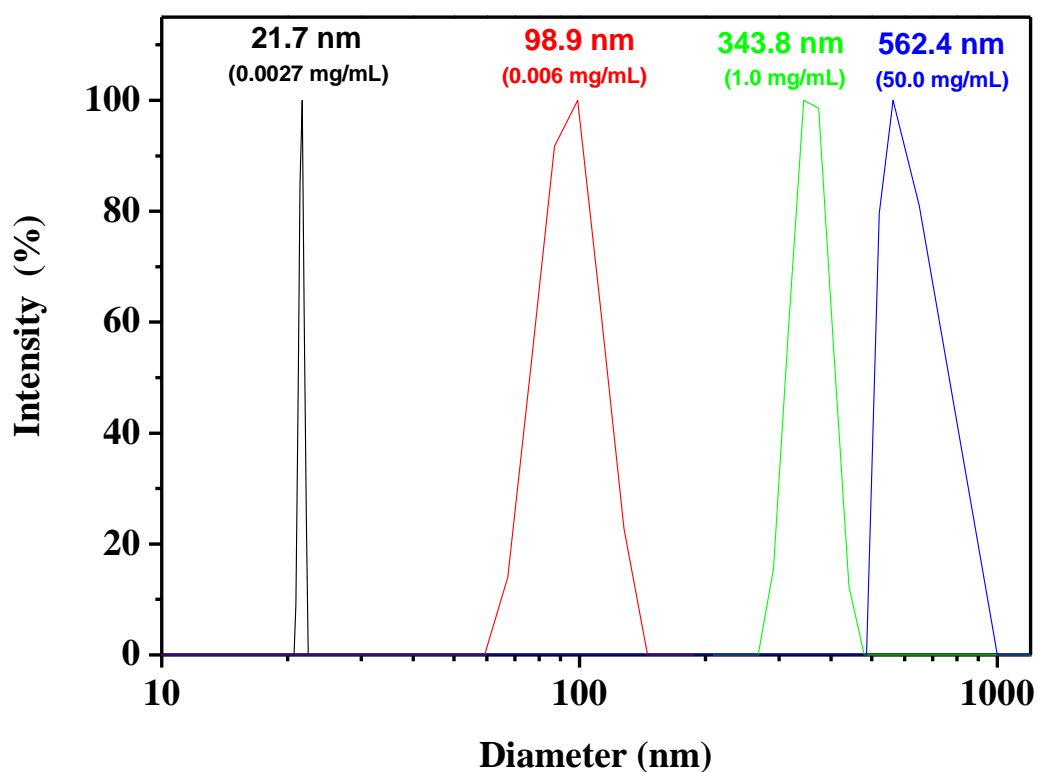

**Figure S15.** Size distribution analysis (DLS) at differential concentrations of BU-DPy-PEG1T in chloroform.

The DLS data are in good agreement with those of the AFM results: nanoparticles 22 nm in diameter in extremely dilute solutions and aggregates for more concentrated solutions. It should be noted that these larger particles scatter much more broadly than an extremely dilute sample (0.0027 mg/mL); it is therefore likely that linear polymers are present in the more concentrated samples.

## References

**S1.** W. H. Binder and R. Sachsenhofer, *Macromol. Rapid Commun.* 2008, **29**, 1097.
